# Supplementary material
Source: PubMed Central journal article supplement (PMC11151784)
Supplement: NIHMS1994743-supplement-1.pdf [file NIHMS1994743-supplement-1.pdf]

**Appendix A. Zero-inflated Poisson regression analyses**

| Predictors entered in set |        | Suicide ideation |             |          |
|---------------------------|--------|------------------|-------------|----------|
|                           |        | <i>B</i>         | <i>S.E.</i> | <i>p</i> |
| PB Model                  |        |                  |             |          |
|                           | Alc    | -0.117           | 0.169       | 0.487    |
|                           | PB     | -0.099           | 0.059       | 0.092    |
|                           | AlcXPB | 0.003            | 0.015       | 0.831    |
| TB Model                  |        |                  |             |          |
|                           | Alc    | -0.076           | 0.102       | 0.453    |
|                           | TB     | 0.018            | 0.039       | 0.634    |
|                           | AlcXTB | -0.003           | 0.009       | 0.708    |

Note. PB = perceived burdensomeness; TB = thwarted belongingness; Alc = alcohol use. Zero-inflated Poisson regression analyses were conducted using the "STATS ZEROINFL" R extension in SPSS version 25.
